# Supplementary material for: Comparative Analysis of Genome Editors Efficiency on a Model of Mice Zygotes Microinjection
Source: MDPI journal article supplement (doi:10.3390/ijms221910221), 2021-09-23
Supplement: s1 [file s1]

# Comparative analysis of genome editors efficiency on a model of mice zygotes microinjection

**Olga A. Averina<sup>1,2</sup>, Oleg A. Permyakov<sup>2</sup>, Olga O. Grigorieva<sup>2</sup>, Alexey S. Starshin<sup>3</sup>, Alexander M. Mazur<sup>3</sup>, Egor B. Prokhortchouk<sup>3</sup>, Olga A. Dontsova<sup>4,5,6</sup> and Petr V. Sergiev<sup>2,4,5\*</sup>**

<sup>1</sup> Institute of functional genomics, , Lomonosov Moscow State University, Moscow, Russia; [ifg.mouse@gmail.com](mailto:ifg.mouse@gmail.com)

<sup>2</sup> Belozersky Institute of Physico-Chemical Biology, Lomonosov Moscow State University, Moscow, Russia; [fxb@genebee.msu.ru](mailto:fxb@genebee.msu.ru)

<sup>3</sup> Institute of Bioengineering, Research Center of Biotechnology of the Russian Academy of Sciences, Moscow, Russia; [info@fbras.ru](mailto:info@fbras.ru)

<sup>4</sup> Department of chemistry, Lomonosov Moscow State University, Moscow, Russia; [press@chem.msu.ru](mailto:press@chem.msu.ru)

<sup>5</sup> Center of life sciences, Skolkovo Institute of Science and Technology, Moscow, Russia; [inbox@skoltech.ru](mailto:inbox@skoltech.ru)

<sup>6</sup> Shemyakin-Ovchinnikov Institute of Bioorganic Chemistry, Moscow, Russia; [office@ibch.ru](mailto:office@ibch.ru)

\* Correspondence: Petr V. Sergiev; [petya@genebee.msu.ru](mailto:petya@genebee.msu.ru)

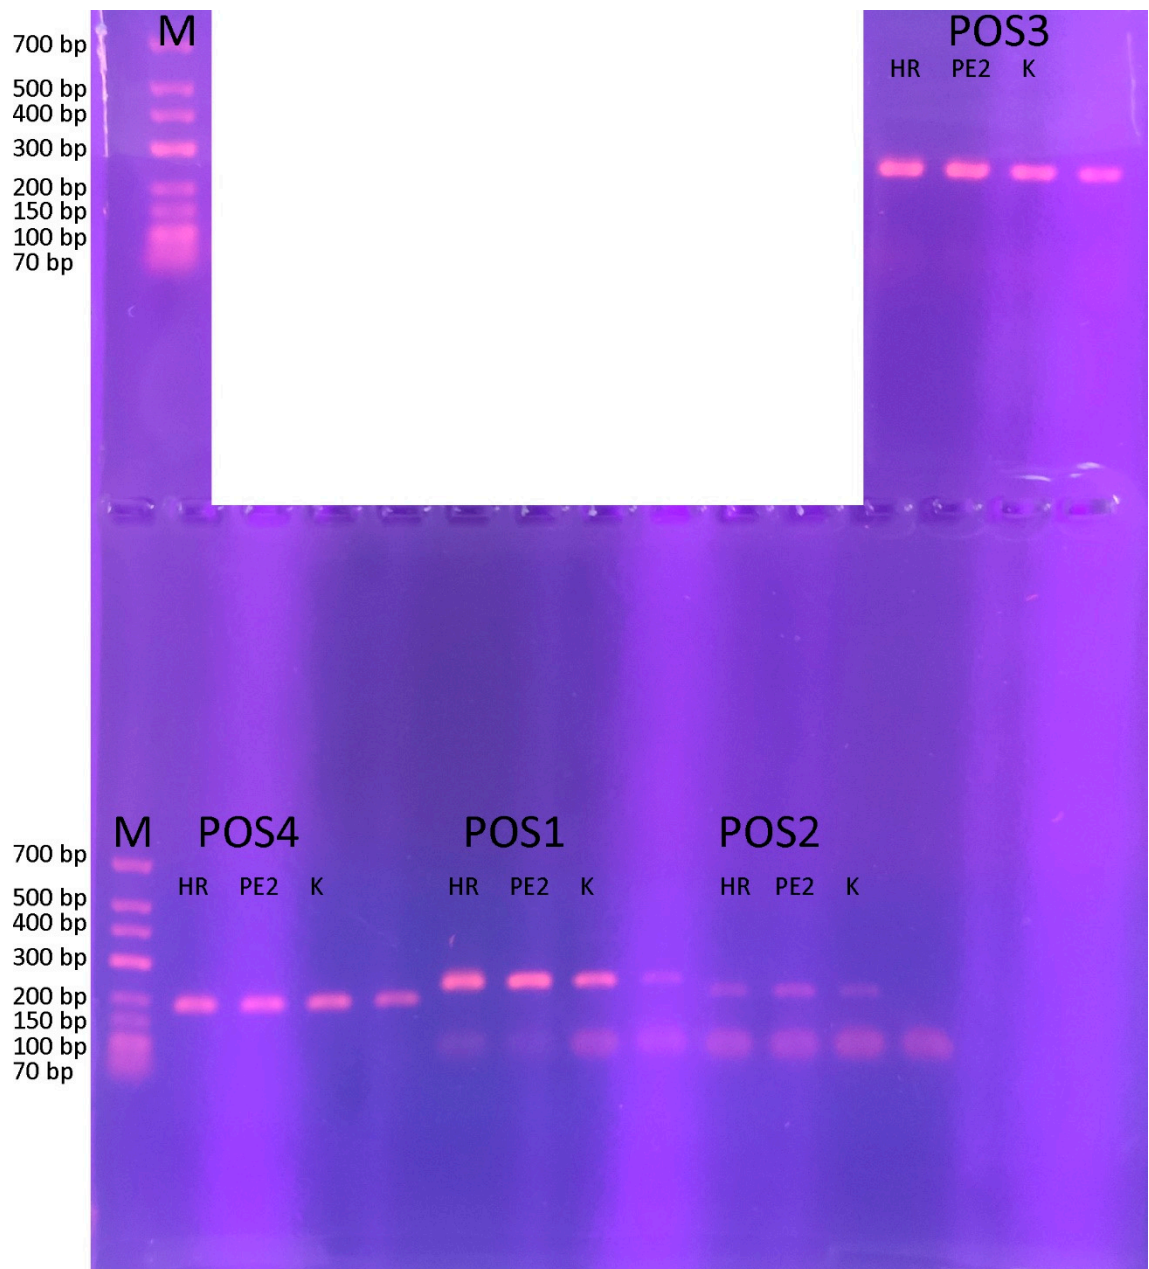

**Supplementary Figure S1.** Agarose gel of typical amplicons used for NGS analysis of editing efficiencies. Lanes are marked M (molecular weight markers); POS1-4 (amplicons corresponding to the editing positions 1-4); HR – amplicons derived from blastocysts developed from zygotes injected with Cas9 mRNA, sgRNA and ssDNA template for HR; PE2 – amplicons derived from blastocysts developed from zygotes injected with PE2 mRNA and pegRNA; K-wild type control.

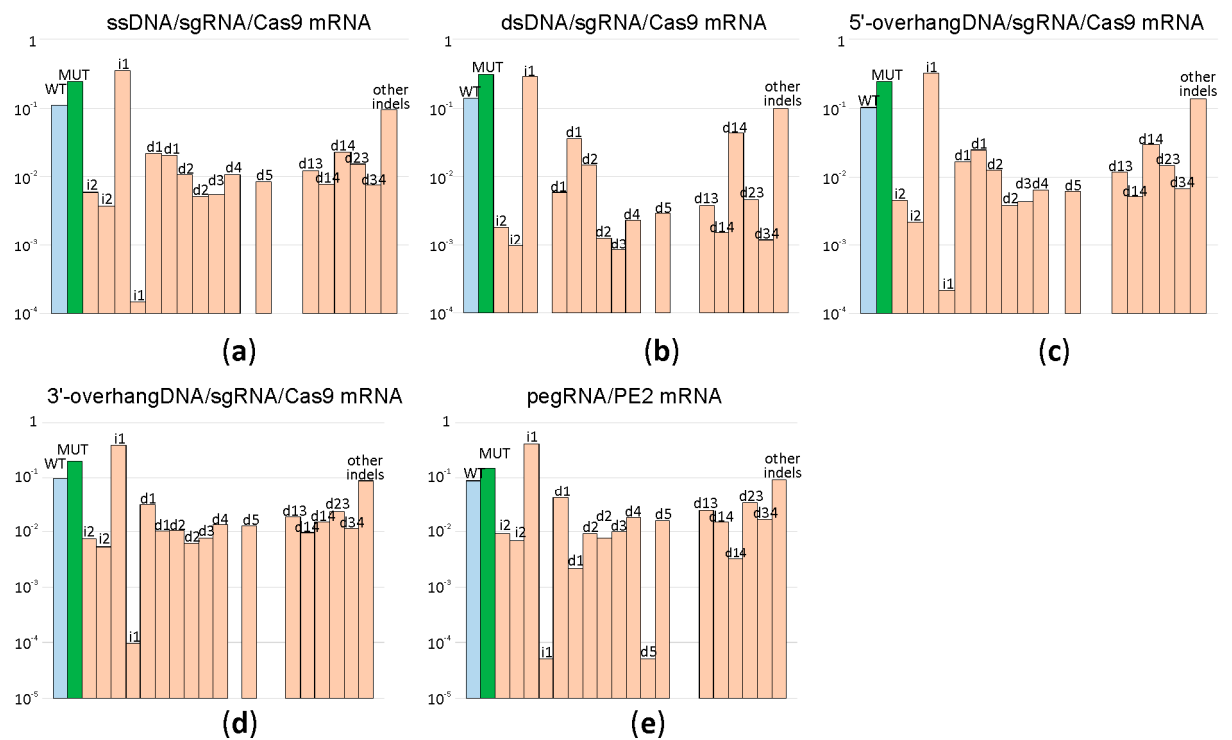

**Supplementary Figure S2.** Comparison of genome editing efficiencies for HR programmed by different types of templates as well as alternative methods of genome editing (the results of second experiment). Shown are frequencies of allelic variants, in the logarithmic scale, detected in the blastocysts developed from the zygotes after microinjection. Blue bars correspond to the wild type genotype, green to the mutation programmed by a template, while pale red to insertions and deletions. Allelic variants are designated above the bars. (a) Frequency of genome editing products by sgRNA directed cleavage and ssDNA guided HR; Cas9 was provided by injection of Cas9 mRNA. (b) Frequency of genome editing products by sgRNA directed cleavage and dsDNA guided HR; Cas9 was provided by injection of Cas9 mRNA. (c) Frequency of genome editing products by sgRNA directed cleavage and HR guided by DNA template with 5'-overhang; Cas9 was provided by injection of Cas9 mRNA. (d) Frequency of genome editing products by sgRNA directed cleavage and HR guided by DNA template with 3'-overhang; Cas9 was provided by injection of Cas9 mRNA. (e) Frequency of genome editing products by pegRNA directed cleavage and reverse transcription by PE2. For each construct the percentage of zygotes developed to the blastocyst or morula stage is indicated above the graph.

**Supplementary Table S1.** Sequences of primers.

|           |                                                                                                                                                                                                                    |
|-----------|--------------------------------------------------------------------------------------------------------------------------------------------------------------------------------------------------------------------|
| CasSA_F   | TGTAATACGACTCACTATAGGGAATACAAGCTACTTGTCTTTTTGCA                                                                                                                                                                    |
| CasSA_R   | TTTTTTTTTTTTTTTTTTTTTTTTTTTTTTTTTTTTTTTTGCGAATAAAAAACCTCCACACC                                                                                                                                                     |
| T7 (PE_F) | TGTAATACGACTCACTATAG                                                                                                                                                                                               |
| PE_R      | TTTTTTTTTTTTTTTTTTTTTTTTTTTTTTTTTTTTTTTTTGCATGCAATTTCTCATTTTATTAGGAAAGG                                                                                                                                            |
| sgRNA rev | AAAAGCACCGACTCGGTGCC                                                                                                                                                                                               |
| 1_HR      | AGACCATCGAGACTGCCTGGCTCAGTACCATCTCTCCAGCTCTGCGTGGGCTTCAATGGGGGCAAGGACTGCACCGCACTCCTGCACCT<br>CTTCCATGTAGCCGTGCAGAGGTAAGCTACCCCTGGGAGCTAAGGCCTCAGAAAGACCCACCTGAAACCTCTCCAGCTCCCCACCCAGAA<br>AAGCACAGCGTCAGCGTG      |
| 1_PEF     | TGTAATACGACTCACTATAGGCTTACCTCTGCACGGCTGCAGTTTTAGAGCTAGAAATAGCAAG                                                                                                                                                   |
| 1_PER     | AAAACCTCTGCACGGCTACATGGAAGAGCACCGACTCGGTGCCACTTTTTTC                                                                                                                                                               |
| 1_CHK_F1  | AGTCTCTGCGTGGGCTTCAATGG                                                                                                                                                                                            |
| 1_CHK_F2  | CTGCTCTGCGTGGGCTTCAATGG                                                                                                                                                                                            |
| 1_CHK_R   | GCTGATCACCTAGTACCTTCC                                                                                                                                                                                              |
| 2_HR      | TGTGGCTGAGGACAGGTCTAGTGACTGATTGTCAATTTCCAGGACTGGACCTACAGAAACATCTGGGAGTTTCTGCGGCAGCTGTTTGCC<br>CATACTGCATCCTATATGACTGAGGGTAAGGTGGTTGACGGGCTGGGGTGAGAGGATGCTGGGAAAGAGAGCCACCCATCACCCACAT<br>CACCCACATGCTCCTGTCTC     |
| 2_PEF     | TGTAATACGACTCACTATAGGACTGCATCCTATATGACAGAGTTTTAGAGCTAGAAATAGCAAG                                                                                                                                                   |
| 2_PER     | AAAACATCCTATATGACTGAGGGTAAGGCACCGACTCGGTGCCACTTTTTTC                                                                                                                                                               |
| 2_CHK_F1  | AGTATCTGGGAGTTTCTGCGGC                                                                                                                                                                                             |
| 2_CHK_F2  | CTGATCTGGGAGTTTCTGCGGC                                                                                                                                                                                             |
| 2_CHK_R   | AGGGATGTGTACCTGGAGTGTT                                                                                                                                                                                             |
| 3_HR      | TTAAAAATATTGAACTTTTATTTTTTACCATTAGAAAAATTCTTTAGAAACAGATATTCCTACTGTGAATATTTAGCTGATGAAGAATTCCT<br>TCCCCTCAAGAAAAACGTTTGACCTGGTGGTTAGCAGCTTAAGGTTAGTAATCCATTTGTACTTTAAAAAATATGTTACAGAGGCTAGT<br>GAGATACTCTGACT        |
| 3_PEF     | TGTAATACGACTCACTATAGGTCAAACGTGTTTTCTTGAAGTTTTAGAGCTAGAAATAGCAAG                                                                                                                                                    |
| 3_PER     | AAAAACGTGTTTTCTTGAGGGGAAGGGCACCGACTCGGTGCCACTTTTTTC                                                                                                                                                                |
| 3_CHK_F   | AGCATTAGGAGTGTCAACAATGA                                                                                                                                                                                            |
| 3_CHK_R1  | AGTGCTGCTAACCACCAAGTCAA                                                                                                                                                                                            |
| 3_CHK_R2  | CTGGCTGCTAACCACCAAGTCAA                                                                                                                                                                                            |
| 4_HR      | TGGATCATGACTTGATACTGAGCTGGGGTATTTGCAGACTTGATACTGAGCTGGGGGTATTTGCAGTATTCTCTCAAAGTCCAGTAGTC<br>TATTTTATAGGTATGTAAGAGAGCAACTGTTCTTGAACAGAAAAAGCCCTGCTGCACCGAGACACAATGCTGGCAGCTGCAGCGGTTTACA<br>GAGGTGAGCCGCCCACTCC    |
| 4_PEF     | TGTAATACGACTCACTATAGGAGTAGTCTATTTTATAGGTATGTTTTAGAGCTAGAAATAGCAAG                                                                                                                                                  |
| 4_PER     | AAAAGTCTATTTTTAGGTATGTAAGAGAGCAACTGCACCGACTCGGTGCCACTTTTTTC                                                                                                                                                        |
| 4_CHK_F1  | AGTATTTGCAGTATTCTCTCAAAGTCC                                                                                                                                                                                        |
| 4_CHK_F2  | CTGATTTGCAGTATTCTCTCAAAGTCC                                                                                                                                                                                        |
| 4_CHK_R   | CCATCTGTGATTGCAGGTAGAA                                                                                                                                                                                             |
| 5_HR      | GTTTTTCTTCTCAGATATTGAAATACCTCACGAAACATTTCTTAGCATTGAATCCAAAGATCACCGGTTACAGAATGTGAAGGTCATTCTGT<br>TGCTACCTCGGCCTCCAGCCTCGGTGTCAGCAACCCAGTGGAATTCATTCTAAATGAACACGAAGGTACTTGTTTTGATTTCTAAATTAAT<br>GAAATTCATTGA        |
| 5_HR_DS   | TAATCAATGAATTTCAATTAATTTAGAAATCAAAACAAGTACCTTCGTGTTCAATTTAGAATGAATTCCTGCGGTTGCTGACACCGAGGCTGG<br>AGGCGCGAGGTAGCAACAGAATGACCTTCACATTCTGTAACCGGTGATCTTTGGATTCAATGCTAAGAAATGTTTCGTGAAGTATTTCAT<br>ATCTGAGAAGAAAAAAC   |
| 5_HR_5    | ATTGTTTAATTTTGAATCAATGAGTTTCATGATTAACCTCACGAGTAATTAATCAATGAATTTCAATTAATTTAGAAATCAAAACAAGTACCT<br>TCGTGTTCAATTTAGAATGAATTCCTAGGTTGCTGACACCGAGGCTGGAGGCGCGAGGTAGCAACAGAATGACCTTCACATTCTGTAACC<br>GGTGATCTTTGGATTCT   |
| 5_HR_3    | CATTAGAATGAATTCCTGCGGTTGCTGACACCGAGGCTGGAGGCGCGAGGTAGCAACAGAATGACCTTCACATTCTGTAACCGGTGAT<br>CTTTGGATTCAATGCTAAGAAATGTTTCGTGAAGTATTTCAATATCTGAGAAGAAAAAACAGCAAGCAAAACAAAAGAAAAACACTCGT<br>GTTAAATATGAAAAATCTG       |
| 5_HR_bio  | Biotin- GTTTTTCTTCTCAGATATTGAAATACCTCACGAAACATTTCTTAGCATTGAATCCAAAGATCACCGGTTACAGAATGTGAAGGTC<br>ATTCTGTTGCTACCTCGGCCTCCAGCCTCGGTGTCAGCAACCCAGTGGAATTCATTCTAAATGAACACGAAGGTACTTGTTTTGATTTCTA<br>AATTAATGAATTCATTGA |
| 5_PEF     | TGTAATACGACTCACTATAGGTGGGTTGCTGACACCGAGGCGTTTTAGAGCTAGAAATAGCAAG                                                                                                                                                   |
| 5_PER     | C AAAATTGCTGACACCGAGGCTAGAGGCGCGAGGTAGCAACAGAAGCACCGACTCGGTGCCACTTTTT                                                                                                                                              |
| 5_SGF     | TGTAATACGACTCACTATAGGACACCGAGGCTGGAACAGCGGTTTTAGAGCTAGAAATAGCAAG                                                                                                                                                   |
| 5_CHK_F   | GTCAAGAGCTGCAGTCACAT                                                                                                                                                                                               |
| 5_CHK_R1  | AGTAGAATGAATTCCTGCGGTTGC                                                                                                                                                                                           |
| 5_CHK_R2  | CTGAGAATGAATTCCTGCGGTTGC                                                                                                                                                                                           |
| 5_CHK_R3  | TACAGAATGAATTCCTGCGGTTGC                                                                                                                                                                                           |
| 5_CHK_R4  | GCAAGAATGAATTCCTGCGGTTGC                                                                                                                                                                                           |
| 5_CHK_R5  | ACGAGAATGAATTCCTGCGGTTGC                                                                                                                                                                                           |
| 5_CHK_R6  | CATAGAATGAATTCCTGCGGTTGC                                                                                                                                                                                           |
| 5_CHK_R7  | TGAAGAATGAATTCCTGCGGTTGC                                                                                                                                                                                           |
| 5_CHK_R8  | GTCAGAATGAATTCCTGCGGTTGC                                                                                                                                                                                           |

**Supplementary Table S2.** Survival rate after microinjection.

| Construct            | Injected zygotes | Developed to blastocyst stage | Developed to morula stage | Dead       | Comments     |
|----------------------|------------------|-------------------------------|---------------------------|------------|--------------|
| POS1 HR              | 58               | 27 (47%)                      | 4 (7%)                    | 27 (47%)   |              |
| POS1 PE2             | 69               | 30 (43%)                      | 0 (0%)                    | 39 (57%)   |              |
| POS2 HR              | 182              | 14 (77%)                      | 9 (5%)                    | 159 (87%)  |              |
| POS2 PE2             | 62               | 18 (29%)                      | 9 (15%)                   | 35 (56%)   |              |
|                      | 64               | 0 (0%)                        | 0 (0%)                    | 64 (100%)  | Not analyzed |
| POS3 HR              | 153              | 26 (17%)                      | 0 (0%)                    | 127 (83%)  |              |
| POS3 PE2             | 132              | 12 (9%)                       | 4 (3%)                    | 116 (88%)  |              |
| POS4 HR              | 34               | 21 (62%)                      | 6 (18%)                   | 7 (20%)    |              |
| POS4 PE2             | 64               | 20 (31%)                      | 0 (0%)                    | 44 (69%)   |              |
| POS5 ssDNA           | 48               | 4 (8%)                        | 13 (27%)                  | 31 (65%)   |              |
|                      | 49               | 5 (10%)                       | 4 (8%)                    | 40 (82%)   |              |
|                      | 286              | 17 (6%)                       | 28 (10%)                  | 241 (84%)  |              |
|                      | 57               | 11 (19%)                      | 6 (11%)                   | 40 (70%)   |              |
|                      | 81               | 28 (35%)                      | 17 (21%)                  | 36 (44%)   |              |
|                      | 134              | 0 (0%)                        | 0 (0%)                    | 134 (100%) | Not analyzed |
|                      | 115              | 25 (22%)                      | 15 (13%)                  | 75 (65%)   | Not analyzed |
|                      | 40               | 13 (33%)                      | 11 (28%)                  | 16 (40%)   | Not analyzed |
| POS5 dsDNA           | 55               | 8 (15%)                       | 12 (22%)                  | 35 (64%)   |              |
|                      | 266              | 0 (0%)                        | 0 (0%)                    | 266 (100%) | Not analyzed |
|                      | 88               | 21 (24%)                      | 4 (5%)                    | 63 (72%)   |              |
|                      | 64               | 12 (19%)                      | 20 (31%)                  | 32 (50%)   |              |
| POS5 5' overhang     | 112              | 0 (0%)                        | 0 (0%)                    | 112 (100%) | Not analyzed |
|                      | 92               | 0 (0%)                        | 8 (9%)                    | 84 (91%)   | Not analyzed |
|                      | 29               | 0 (0%)                        | 0 (0%)                    | 29 (100%)  | Not analyzed |
|                      | 104              | 21 (20%)                      | 2 (2%)                    | 81 (78%)   |              |
|                      | 135              | 0 (0%)                        | 0 (0%)                    | 135 (100%) | Not analyzed |
|                      | 135              | 0 (0%)                        | 0 (0%)                    | 135 (100%) | Not analyzed |
|                      | 97               | 4 (4%)                        | 34 (35%)                  | 59 (61%)   |              |
| POS5 3' overhang     | 48               | 10 (21%)                      | 5 (10%)                   | 33 (69%)   |              |
|                      | 38               | 5 (13%)                       | 2 (5%)                    | 31 (82%)   |              |
|                      | 142              | 0 (0%)                        | 0 (0%)                    | 142 (100%) | Not analyzed |
|                      | 34               | 9 (26%)                       | 0 (0%)                    | 25 (74%)   |              |
|                      | 63               | 32 (51%)                      | 0 (0%)                    | 31 (49%)   | Not analyzed |
| POS5 5' bio-ssDNA    | 63               | 16 (25%)                      | 11 (17%)                  | 26 (41%)   |              |
| POS5 HR Cas9 protein | 138              |                               |                           |            |              |
|                      |                  | 17 (12%)                      | 4 (3%)                    | 117 (85%)  |              |
| POS5 PE2             | 83               | 6 (7%)                        | 13 (16%)                  | 64 (77%)   |              |
|                      | 58               | 17 (29%)                      | 3 (5%)                    | 38 (66%)   |              |
|                      | 97               | 48 (49%)                      | 0 (0%)                    | 49 (51%)   |              |
|                      | 123              | 0 (0%)                        | 0 (0%)                    | 123 (100%) | Not analyzed |
|                      | 76               | 4 (5%)                        | 4 (5%)                    | 68 (89%)   | Not analyzed |
| No injection         | 10               | 10 (100%)                     | 0 (0%)                    | 0 (0%)     | Not analyzed |
|                      | 10               | 7 (70%)                       | 3 (30%)                   | 0 (0%)     | Not analyzed |
|                      | 10               | 6 (60%)                       | 1 (10%)                   | 3 (30%)    | Not analyzed |
|                      | 10               | 4 (40%)                       | 0 (0%)                    | 6 (60%)    | Not analyzed |
|                      | 10               | 10 (100%)                     | 0 (0%)                    | 0 (0%)     | Not analyzed |
|                      | 10               | 7 (70%)                       | 0 (0%)                    | 3 (30%)    | Not analyzed |
|                      | 10               | 7 (70%)                       | 0 (0%)                    | 3 (30%)    | Not analyzed |
|                      | 10               | 7 (70%)                       | 0 (0%)                    | 3 (30%)    | Not analyzed |
|                      | 14               | 6 (43%)                       | 0 (0%)                    | 8 (57%)    | Not analyzed |
|                      | 10               | 4 (40%)                       | 1 (10%)                   | 5 (50%)    | Not analyzed |
|                      | 10               | 2 (20%)                       | 3 (30%)                   | 5 (50%)    | Not analyzed |
|                      | 10               | 2 (20%)                       | 3 (30%)                   | 5 (50%)    | Not analyzed |
|                      | 10               | 3 (30%)                       | 6 (60%)                   | 1 (10%)    | Not analyzed |
|                      | 10               | 4 (40%)                       | 2 (20%)                   | 4 (40%)    | Not analyzed |
|                      | 10               | 7 (70%)                       | 0 (0%)                    | 3 (30%)    | Not analyzed |
|                      | 10               | 0 (0%)                        | 2 (20%)                   | 8 (80%)    | Not analyzed |
|                      | 10               | 3 (30%)                       | 0 (0%)                    | 7 (70%)    | Not analyzed |
|                      | 10               | 5 (50%)                       | 0 (0%)                    | 5 (50%)    | Not analyzed |
|                      | 10               | 5 (50%)                       | 0 (0%)                    | 5 (50%)    | Not analyzed |
|                      | 10               | 5 (50%)                       | 1 (10%)                   | 4 (40%)    | Not analyzed |
|                      | 10               | 6 (60%)                       | 0 (0%)                    | 4 (40%)    | Not analyzed |
|                      | 10               | 5 (50%)                       | 0 (0%)                    | 5 (50%)    | Not analyzed |
|                      | 10               | 4 (40%)                       | 2 (20%)                   | 4 (40%)    | Not analyzed |
|                      | 10               | 7 (70%)                       | 3 (30%)                   | 0 (0%)     | Not analyzed |
|                      | 10               | 4 (40%)                       | 3 (30%)                   | 3 (30%)    | Not analyzed |
|                      | 10               | 5 (50%)                       | 5 (50%)                   | 0 (0%)     | Not analyzed |
|                      | 10               | 4 (40%)                       | 2 (20%)                   | 4 (40%)    | Not analyzed |
|                      | 10               | 5 (50%)                       | 2 (20%)                   | 3 (30%)    | Not analyzed |
|                      | 10               | 6 (60%)                       | 3 (30%)                   | 1 (10%)    | Not analyzed |
|                      | 10               | 7 (70%)                       | 0 (0%)                    | 3 (30%)    | Not analyzed |
|                      | 8                | 1 (13%)                       | 0 (0%)                    | 9 (113%)   | Not analyzed |
|                      | 10               | 9 (90%)                       | 0 (0%)                    | 1 (10%)    | Not analyzed |
|                      | 48               | 24 (50%)                      | 20 (42%)                  | 4 (8%)     | Not analyzed |

**Supplementary Table S3.** Sequences and frequencies of allelic variants at position 1.

|     | Allelic variant                                              | Editing strategy/<br>frequency of allelic<br>variant |       |         |
|-----|--------------------------------------------------------------|------------------------------------------------------|-------|---------|
|     |                                                              | HR                                                   | PE2   |         |
| WT  | CTCTGCGTGGGCTTCAATGGGGGCAAGGACTGCACCGCACTCCTGCACCTCTTCCATG   | CAGCCGTGCAGAGGTAAGC                                  | 0,26  | 0,96    |
| MUT | CTCTGCGTGGGCTTCAATGGGGGCAAGGACTGCACCGCACTCCTGCACCTCTTCCATG   | TAGCCGTGCAGAGGTAAGC                                  | 0,067 | 0,002   |
| i1  | CTCTGCGTGGGCTTCAATGGGGGCAAGGACTGCACCGCACTCCTGCACCTCTTCCATGC  | AAGCCGTGCAGAGGTAAGC                                  | 0,28  | 0,006   |
| d3  | CTCTGCGTGGGCTTCAATGGGGGCAAGGACTGCACCGCACTCCTGCACCTCTTCCATGC  | ...CGTGCAGAGGTAAGC                                   | 0,076 | 0,0015  |
| d8  | CTCTGCGTGGGCTTCAATGGGGGCAAGGACTGCACCGCACTCCTGCACCTCTTCCATG   | ...CAGAGGTAAGC                                       | 0,026 | 0,0005  |
| d3  | CTCTGCGTGGGCTTCAATGGGGGCAAGGACTGCACCGCACTCCTGCACCTCTTCCATC   | C CCTGGGAGC...TAAGC                                  | 0,019 | 0,0002  |
| d8  | CTCTGCGTGGGCTTCAATGGGGGCAAGGACTGCACCGCACTCCTGCACCTCTTCC...   | ...GTGCAGAGGTAAGC                                    | 0,017 | 1E-04   |
| d1  | CTCTGCGTGGGCTTCAATGGGGGCAAGGACTGCACCGCACTCCTGCACCTCTTCCATG   | T GCGGTGCAGAGGTAAGC                                  | 0,01  | 0,0002  |
| i2  | CTCTGCGTGGGCTTCAATGGGGGCAAGGACTGCACCGCACTCCTGCACCTCTTCCATGCC | ATGCCGTGCAGAGGTAAGC                                  | 0,01  | 0,0002  |
| d4  | CTCTGCGTGGGCTTCAATGGGGGCAAGGACTGCACCGCACTCCTGCACCTCTTCCATGC  | ...GTGCAGAGGTAAGC                                    | 0,007 | 0,00015 |
| d2  | CTCTGCGTGGGCTTCAATGGGGGCAAGGACTGCACCGCACTCCTGCACCTCTTCCATGG  | ...CCGTGCAGAGGTAAGC                                  | 0,006 | 0,0002  |

|     |                                                                                          |       |        |
|-----|------------------------------------------------------------------------------------------|-------|--------|
| d66 | CTCTGCGTGGGCTTCAATGGGGCAAGGACTGCACCGCACTCCTGCACCTCTTCCATG (d66) CAGCTCCCACCCC            | 0,009 | 0,0002 |
| i2  | CTCTGCGTGGGCTTCAATGGGGCAAGGACTGCACCGCACTCCTGCACCTCTTCCATG <b>CCAT</b> GGCGTGACAGAGGTAAGC | 0,006 | 1E-04  |
| i1  | CTCTGCGTGGGCTTCAATGGGGCAAGGACTGCACCGCACTCCTGCACCTCTTCCATG <b>TAAG</b> CCGTGCAGAGGTAAGC   | 0,006 | 1E-04  |
| d22 | CTCTGCGTGGGCTTCAATGGGGCAAGGACTGCACCGCACTCCTGCACCTCTTCCATG (d22) CCCCTGGGAGCTAA           | 0,005 | 0,0001 |
| d9  | CTCTGCGTGGGCTTCAATGGGGCAAGGACTGCACCGCACTCCTGCACCTCTTC . . . . . GTGCAGAGGTAAGC           | 0,005 | 3E-05  |
| d1  | CTCTGCGTGGGCTTCAATGGGGCAAGGACTGCACCGCACTCCTGCACCTCTTCCATG C·GCCGTGCAGAGGTAAGC            | 0,005 | 7E-05  |

**Supplementary Table S4.** Sequences and frequencies of allelic variants at position 2.

|     | Allelic variant                                                                         | Editing strategy/<br>frequency of allelic<br>variant |          |
|-----|-----------------------------------------------------------------------------------------|------------------------------------------------------|----------|
|     |                                                                                         | HR                                                   | PE2      |
| WT  | ATCTGGGAGTTTCTGCGGCAGCTGTTTGTCCCACTACTGCATCCTATATGAC AGAGGGTAAGGTGGTTGACGGGCTGG         | 0,68                                                 | 0,97     |
| MUT | ATCTGGGAGTTTCTGCGGCAGCTGTTTGTCCCACTACTGCATCCTATATGAC <b>T</b> GAGGGTAAGGTGGTTGACGGGCTGG | 0,1                                                  | 0,005    |
| d4  | ATCTGGGAGTTTCTGCGGCAGCTGTTTGTCCCACTACTGCATCCTATATGA· · · · GGGTAAAGTGGTTGACGGGCTGG      | 0,05                                                 | 0,0007   |
| d3  | ATCTGGGAGTTTCTGCGGCAGCTGTTTGTCCCACTACTGCATCCTATATGA· · GA·GGTAAGTGGTTGACGGGCTGG         | 0,02                                                 | 0,0004   |
| d8  | ATCTGGGAGTTTCTGCGGCAGCTGTTTGTCCCACTACTGCATCCTAT· · · · · GGGTAAAGTGGTTGACGGGCTGG        | 0,014                                                | 0,00015  |
| i1  | ATCTGGGAGTTTCTGCGGCAGCTGTTTGTCCCACTACTGCATCCTATATGACCAGAGGGTAAGTGGTTGACGGGCTGG          | 0,013                                                | 0,0002   |
| d9  | ATCTGGGAGTTTCTGCGGCAGCTGTTTGTCCCACTACTGCATCCTA· · · · · GGGTAAAGTGGTTGACGGGCTGG         | 0,005                                                | 2,5E-05  |
| d3  | ATCTGGGAGTTTCTGCGGCAGCTGTTTGTCCCACTACTGCATCCTATATAGA · · · GGGTAAAGTGGTTGACGGGCTGG      | 0,011                                                | 0,0002   |
| d5  | ATCTGGGAGTTTCTGCGGCAGCTGTTTGTCCCACTACTGCATCCTATA· · · · · GAGGGTAAGTGGTTGACGGGCTGG      | 0,008                                                | 0,0001   |
| d14 | ATCTGGGAGTTTCTGCGGCAGCTGTTTGTCC· · · · · TATA· · TG AGAGGGTAAGTGGTTGACGGGCTGG           | 0,007                                                | 1E-04    |
| d1  | ATCTGGGAGTTTCTGCGGCAGCTGTTTGTCCCACTACTGCATCCTATATGAC · GAGGGTAAGTGGTTGACGGGCTGG         | 0,005658                                             | 6,24E-05 |
| d12 | ATCTGGGAGTTTCTGCGGCAGCTGTTTGTCCCACTACTGCA· · · · · GAGGGTAAGTGGTTGACGGGCTGG             | 0,005606                                             | 7,49E-05 |
| d15 | ATCTGGGAGTTTCTGCGGCAGCTGTTTGTCCCACTAG· · · · · AGGGTAAGTGGTTGACGGGCTGG                  | 0,00313                                              | 6,24E-05 |

**Supplementary Table S5.** Sequences and frequencies of allelic variants at position 3.

|     | Allelic variant                                                                        | Editing strategy/<br>frequency of allelic<br>variant |        |
|-----|----------------------------------------------------------------------------------------|------------------------------------------------------|--------|
|     |                                                                                        | HR                                                   | PE2    |
| WT  | GCTGCTAACCAACAGGTCAAACGTGTTTTCTTGGAAAGGAAGGAATTCCTTCATCAGCTAAATATTTCACAGTAGGAA         | 0,98                                                 | 0,99   |
| MUT | GCTGCTAACCAACAGGTCAAACGTGTTTTCTTGGAG <b>G</b> GAAGGAATTCCTTCATCAGCTAAATATTTCACAGTAGGAA | 0,013                                                | 0,005  |
| d1  | GCTGCTAACCAACAGGTCAAACGTGTTTTCTTG· AAGGAAGGAATTCCTTCATCAGCTAAATATTTCACAGTAGGAA         | 0,007                                                | 0,0001 |

**Supplementary Table S6.** Sequences and frequencies of allelic variants at position 4.

|     | Allelic variant                                                                         | Editing strategy/<br>frequency of allelic<br>variant |        |
|-----|-----------------------------------------------------------------------------------------|------------------------------------------------------|--------|
|     |                                                                                         | HR                                                   | PE2    |
| WT  | ATTTCAGTATTCTCTCAAAGTCCAGTAGTCTATTTTAGGT ATGGGTGAGAGCAACTGTTCTTGGAA                     | 0,97                                                 | 0,9995 |
| MUT | ATTTCAGTATTCTCTCAAAGTCCAGTAGTCTATTTTAGGT <b>ATGTA</b> GAGAGCAACTGTTCTTGGAA              | 0,015                                                | 0,0003 |
| d2  | ATTTCAGTATTCTCTCAAAGTCCAGTAGTCTATTTTAGGT · · GGGTGAGAGCAACTGTTCTTGGAA                   | 0,005                                                | 0,0001 |
| d12 | ATTTCAGTATTCTCTCAAAGTCCAGTAG· · · · · TATGGGTGAGAGCAACTGTTCTTGGAA                       | 0,003                                                | 4E-05  |
| i11 | ATTTCAGTATTCTCTCAAAGTCCAGTAGTCTATTTTAGGT <b>GAGTAGTCTAT</b> TATGGGTGAGAGCAACTGTTCTTGGAA | 0,003                                                | 1E-05  |

**Supplementary Table S7.** Sequences and frequencies of allelic variants at position 5.

|     | Allelic variant                                                               | Editing strategy/<br>frequency of allelic<br>variant |         |        |         |         |         |         |         |              |              |        |       |
|-----|-------------------------------------------------------------------------------|------------------------------------------------------|---------|--------|---------|---------|---------|---------|---------|--------------|--------------|--------|-------|
|     |                                                                               | sDNA                                                 | sDNA    | dDNA   | dDNA    | 5' over | 5' over | 3' over | 3' over | bio-<br>sDNA | Cas9<br>prot | PE2    | PE2   |
| WT  | AGATGATTCACCTGGTTCCTGACACGAGCTGGAC· · · · · GGAGTAGCAAGATGACCTTCACATTCCTGA    | 0,18                                                 | 0,11    | 0,46   | 0,14    | 0,09    | 0,19    | 0,30    | 0,10    | 0,19         | 0,31         | 0,84   | 0,99  |
| WT  | AGATGATTCACCTGGTTCCTGACACGAGCTGGAC· · · · · GGAGTAGCAAGATGACCTTCACATTCCTGA    | 0,25                                                 | 0,24    | 0,17   | 0,11    | 0,78    | 0,25    | 0,14    | 0,28    | 0,15         | 0,99         | 0,02   | 0,15  |
| i2  | AGATGATTCACCTGGTTCCTGACACGAGCTGGAC· · · · · GGAGTAGCAAGATGACCTTCACATTCCTGA    | 0                                                    | 0,005   | 0      | 0,002   | 0       | 0,005   | 0       | 0,005   | 0            | 0            | 0      | 0,005 |
| i10 | AGATGATTCACCTGGTTCCTGACACGAGCTGGAC· · · · · GGAGTAGCAAGATGACCTTCACATTCCTGA    | 0,45-05                                              | 0,004   | 0      | 0,001   | 0       | 0,002   | 0       | 0,005   | SE-05        | 0,01         | SE-05  | 0,007 |
| i1  | AGATGATTCACCTGGTTCCTGACACGAGCTGGAC· · · · · GGAGTAGCAAGATGACCTTCACATTCCTGA    | 0,35                                                 | 0,39    | 0,15   | 0,25    | 0,04    | 0,12    | 0,37    | 0,40    | 0,39         | 0,28         | 0,03   | 0,42  |
| i13 | AGATGATTCACCTGGTTCCTGACACGAGCTGGAC· · · · · GGAGTAGCAAGATGACCTTCACATTCCTGA    | 0,04                                                 | 0,00015 | 0,05   | 0       | 0,001   | 0,0001  | 0,001   | 1E-04   | 0,003        | 0,001        | 0,002  | 1E-05 |
| d1  | AGATGATTCACCTGGTTCCTGACACGAGCTGGAC· A· · · · · GGAGTAGCAAGATGACCTTCACATTCCTGA | 0,008                                                | 0,022   | 0,005  | 0,006   | 0,0006  | 0,017   | 0,0006  | 0,01    | 0,03         | 0,002        | 0,0008 | 0,04  |
| d18 | AGATGATTCACCTGGTTCCTGACACGAGCTGGAC· · · · · GGAGTAGCAAGATGACCTTCACATTCCTGA    | 0,003                                                | 0,02    | 0,035  | 0,036   | 0,0006  | 0,025   | 0,0006  | 0,01    | 0,002        | 0,005        | 0,001  | 0,002 |
| d2  | AGATGATTCACCTGGTTCCTGACACGAGCTGGAC· · · · · GGAGTAGCAAGATGACCTTCACATTCCTGA    | 0,003                                                | 0,011   | 0,0003 | 0,015   | 0,0006  | 0,013   | 0,004   | 0,011   | 0,006        | 0,004        | 0,0002 | 0,01  |
| d1  | AGATGATTCACCTGGTTCCTGACACGAGCTGGAC· · · · · GGAGTAGCAAGATGACCTTCACATTCCTGA    | 0,0006                                               | 0,005   | 0,0002 | 0,001   | 0       | 0,004   | 0       | 0,006   | 0,001        | 0            | 1E-05  | 0,008 |
| d1  | AGATGATTCACCTGGTTCCTGACACGAGCTGGAC· · · · · GGAGTAGCAAGATGACCTTCACATTCCTGA    | 7E-05                                                | 0,006   | 0,0002 | 0,00009 | 0,0001  | 0,004   | 0,004   | 0,008   | SE-05        | 0,003        | 0,0002 | 0,01  |
| d4  | AGATGATTCACCTGGTTCCTGACACGAGCTGG· · · · · GGAGTAGCAAGATGACCTTCACATTCCTGA      | 0,0002                                               | 0,011   | 0      | 0,002   | 0       | 0,007   | 0,001   | 0,014   | 0,0001       | 0,0006       | 0,0002 | 0,018 |
| d5  | AGATGATTCACCTGGTTCCTGACACGAGCTGG· · · · · GGAGTAGCAAGATGACCTTCACATTCCTGA      | 0,017                                                | 0       | 0,0005 | 0       | 0,0005  | 0       | 0,0003  | 0       | 0,0003       | 0            | 0,0004 | SE-05 |
| d50 | AGATGATTCACCTGGTTCCTGACACGAGCTGG· · · · · GGAGTAGCAAGATGACCTTCACATTCCTGA      | 0,009                                                | 0,009   | 0,0003 | 0,003   | 0,0007  | 0,006   | 0,004   | 0,013   | 0,0003       | 0,0009       | 0,0003 | 0,016 |
| d7  | AGATGATTCACCTGGTTCCTGACACGAGCTGG· · · · · GGAGTAGCAAGATGACCTTCACATTCCTGA      | 0,0009                                               | 0       | 0,0008 | 0       | 0,0007  | 0       | 0,0004  | 0       | 0,02         | 0,001        | 0,001  | 0     |
| d9  | AGATGATTCACCTGGTTCCTGACACGAGCTGG· · · · · GGAGTAGCAAGATGACCTTCACATTCCTGA      | 0,017                                                | 0       | 0,003  | 0       | 0,0007  | 0       | 0,005   | 0       | 0,011        | 0,001        | 0,001  | 0     |
| d11 | AGATGATTCACCTGGTTCCTGACACGAGCTGG· · · · · AGCAAGATGACCTTCACATTCCTGA           | 0                                                    | 0,012   | 0      | 0,004   | 0       | 0,012   | 0       | 0,019   | 0            | 0            | 0      | 0,024 |
| d14 | AGATGATTCACCTGGTTCCTGACACGAGCTGG· · · · · GGAGTAGCAAGATGACCTTCACATTCCTGA      | 0,01                                                 | 0,008   | 0,012  | 0,002   | 0,003   | 0,005   | 0,008   | 0,01    | 0,043        | 0,062        | 0,003  | 0,015 |
| d15 | AGATGATTCACCTGGTTCCTGACACGAGCTGG· · · · · GGAGTAGCAAGATGACCTTCACATTCCTGA      | 0,005                                                | 0,013   | 0,004  | 0,002   | 0,001   | 0,01    | 0,015   | 0,018   | 0,017        | 0,001        | 0,001  | 0,001 |
| d17 | AGATGATTCACCTGGTTCCTGACACGAGCTGG· · · · · CTTCACATTCCTGA                      | 0,0005                                               | 0,015   | 0,011  | 0,006   | 0,0003  | 0,015   | 0,0003  | 0,023   | 0,003        | 0,006        | 0,0004 | 0,034 |
| d18 | AGATGATTCACCTGGTTCCTGACAC· · · · · CTTCACATTCCTGA                             | 0                                                    | 0,008   | 8E-05  | 0,001   | 0,0003  | 0,007   | 0       | 0,012   | 0,001        | 0            | 0      | 0,017 |
